# Supplementary material for: Probing chemical space with alkaloid-inspired libraries
Source: Springer Nature journal article supplement (doi:10.1038/nchem.1844), 2014-01-17
Supplement: 41557_2014_BFnchem1844_MOESM11_ESM.mol [file 41557_2014_BFnchem1844_MOESM11_ESM.mol]

  ChemDraw01021411012D

 18 20  0  0  0  0  0  0  0  0999 V2000
   -1.3393    0.2746    0.0000 C   0  0  0  0  0  0  0  0  0  0  0  0
   -1.3393   -0.5504    0.0000 C   0  0  0  0  0  0  0  0  0  0  0  0
   -0.6248   -0.9629    0.0000 C   0  0  0  0  0  0  0  0  0  0  0  0
    0.0896   -0.5504    0.0000 C   0  0  0  0  0  0  0  0  0  0  0  0
    0.0896    0.2746    0.0000 C   0  0  0  0  0  0  0  0  0  0  0  0
   -0.6248    0.6871    0.0000 C   0  0  0  0  0  0  0  0  0  0  0  0
    0.7346   -1.0648    0.0000 C   0  0  0  0  0  0  0  0  0  0  0  0
    1.5389   -0.8812    0.0000 C   0  0  0  0  0  0  0  0  0  0  0  0
    1.8969   -0.1379    0.0000 C   0  0  0  0  0  0  0  0  0  0  0  0
    1.5389    0.6054    0.0000 C   0  0  0  0  0  0  0  0  0  0  0  0
    0.7346    0.7890    0.0000 N   0  0  0  0  0  0  0  0  0  0  0  0
    0.0896   -1.3754    0.0000 H   0  0  0  0  0  0  0  0  0  0  0  0
   -2.0521   -0.9619    0.0000 O   0  0  0  0  0  0  0  0  0  0  0  0
   -0.3229    0.9891    0.0000 C   0  0  0  0  0  0  0  0  0  0  0  0
   -0.1094    1.7860    0.0000 C   0  0  0  0  0  0  0  0  0  0  0  0
    0.6875    1.5725    0.0000 C   0  0  0  0  0  0  0  0  0  0  0  0
    2.0521    1.2489    0.0000 O   0  0  0  0  0  0  0  0  0  0  0  0
   -0.6248   -1.7860    0.0000 C   0  0  0  0  0  0  0  0  0  0  0  0
  1  2  1  0      
  2  3  1  0      
  3  4  1  0      
  4  5  1  0      
  5  6  1  0      
  6  1  1  0      
  4  7  1  0      
  7  8  1  0      
  8  9  1  0      
  9 10  1  0      
 10 11  1  0      
 11  5  1  0      
  4 12  1  1      
  2 13  2  0      
  5 14  1  1      
 14 15  1  0      
 15 16  1  0      
 16 11  1  0      
 10 17  2  0      
  3 18  1  6      
M  END
