# Supplementary material for: Probing chemical space with alkaloid-inspired libraries
Source: Springer Nature journal article supplement (doi:10.1038/nchem.1844), 2014-01-17
Supplement: 41557_2014_BFnchem1844_MOESM21_ESM.mol [file 41557_2014_BFnchem1844_MOESM21_ESM.mol]

  ChemDraw01021411012D

 24 27  0  0  0  0  0  0  0  0999 V2000
   -0.9849    1.0964    0.0000 C   0  0  0  0  0  0  0  0  0  0  0  0
   -0.9849    0.2714    0.0000 C   0  0  0  0  0  0  0  0  0  0  0  0
   -0.2704   -0.1411    0.0000 C   0  0  0  0  0  0  0  0  0  0  0  0
    0.4441    0.2714    0.0000 C   0  0  0  0  0  0  0  0  0  0  0  0
    0.4441    1.0964    0.0000 C   0  0  0  0  0  0  0  0  0  0  0  0
   -0.2704    1.5089    0.0000 C   0  0  0  0  0  0  0  0  0  0  0  0
    1.0891   -0.2430    0.0000 C   0  0  0  0  0  0  0  0  0  0  0  0
    1.8934   -0.0594    0.0000 C   0  0  0  0  0  0  0  0  0  0  0  0
    2.2514    0.6839    0.0000 C   0  0  0  0  0  0  0  0  0  0  0  0
    1.8934    1.4272    0.0000 C   0  0  0  0  0  0  0  0  0  0  0  0
    1.0891    1.6108    0.0000 N   0  0  0  0  0  0  0  0  0  0  0  0
    0.4441   -0.5536    0.0000 H   0  0  0  0  0  0  0  0  0  0  0  0
   -1.6977   -0.1401    0.0000 N   0  0  0  0  0  0  0  0  0  0  0  0
    0.0316    1.8109    0.0000 C   0  0  0  0  0  0  0  0  0  0  0  0
    0.2451    2.6078    0.0000 C   0  0  0  0  0  0  0  0  0  0  0  0
    1.0420    2.3942    0.0000 C   0  0  0  0  0  0  0  0  0  0  0  0
    2.4066    2.0707    0.0000 O   0  0  0  0  0  0  0  0  0  0  0  0
   -0.9825   -1.3744    0.0000 C   0  0  0  0  0  0  0  0  0  0  0  0
   -1.6945   -0.9633    0.0000 C   0  0  0  0  0  0  0  0  0  0  0  0
   -2.4066   -1.3744    0.0000 C   0  0  0  0  0  0  0  0  0  0  0  0
   -2.4066   -2.1967    0.0000 C   0  0  0  0  0  0  0  0  0  0  0  0
   -1.6945   -2.6078    0.0000 C   0  0  0  0  0  0  0  0  0  0  0  0
   -0.9825   -2.1967    0.0000 C   0  0  0  0  0  0  0  0  0  0  0  0
   -0.2704   -0.9633    0.0000 C   0  0  0  0  0  0  0  0  0  0  0  0
  1  2  1  0      
  2  3  1  0      
  3  4  1  0      
  4  5  1  0      
  5  6  1  0      
  6  1  1  0      
  4  7  1  0      
  7  8  1  0      
  8  9  1  0      
  9 10  1  0      
 10 11  1  0      
 11  5  1  0      
  4 12  1  1      
  2 13  1  6      
  5 14  1  1      
 14 15  1  0      
 15 16  1  0      
 16 11  1  0      
 10 17  2  0      
  3 24  1  6      
 22 23  2  0      
 21 22  1  0      
 20 21  2  0      
 19 20  1  0      
 18 19  2  0      
 18 23  1  0      
 18 24  1  0      
M  END
