# Supplementary material for: Probing chemical space with alkaloid-inspired libraries
Source: Springer Nature journal article supplement (doi:10.1038/nchem.1844), 2014-01-17
Supplement: 41557_2014_BFnchem1844_MOESM55_ESM.mol [file 41557_2014_BFnchem1844_MOESM55_ESM.mol]

  ChemDraw01021411012D

  6  5  0  0  0  0  0  0  0  0999 V2000
    1.7886   -0.0007    0.0000 O   0  0  0  0  0  0  0  0  0  0  0  0
    1.0717    0.4132    0.0000 C   0  0  0  0  0  0  0  0  0  0  0  0
    0.3548   -0.0007    0.0000 C   0  0  0  0  0  0  0  0  0  0  0  0
   -0.3596    0.4118    0.0000 N   0  0  0  0  0  0  0  0  0  0  0  0
   -1.0741   -0.0007    0.0000 N   0  3  0  0  0  0  0  0  0  0  0  0
   -1.7886   -0.4132    0.0000 N   0  5  0  0  0  0  0  0  0  0  0  0
  1  2  1  0      
  2  3  1  0      
  3  4  1  0      
  5  6  2  0      
  4  5  2  0      
M  CHG  2   5   1   6  -1
M  END
