# Supplementary material for: Probing chemical space with alkaloid-inspired libraries
Source: Springer Nature journal article supplement (doi:10.1038/nchem.1844), 2014-01-17
Supplement: 41557_2014_BFnchem1844_MOESM171_ESM.mol [file 41557_2014_BFnchem1844_MOESM171_ESM.mol]

  ChemDraw01021411352D

 14 16  0  0  0  0  0  0  0  0999 V2000
    1.0847    0.1868    0.0000 C   0  0  0  0  0  0  0  0  0  0  0  0
    0.9011    0.9912    0.0000 C   0  0  0  0  0  0  0  0  0  0  0  0
    0.1578    1.3491    0.0000 C   0  0  0  0  0  0  0  0  0  0  0  0
   -0.5855    0.9912    0.0000 C   0  0  0  0  0  0  0  0  0  0  0  0
   -0.7691    0.1868    0.0000 N   0  0  0  0  0  0  0  0  0  0  0  0
   -0.2547   -0.4582    0.0000 C   0  0  0  0  0  0  0  0  0  0  0  0
    0.5703   -0.4582    0.0000 C   0  0  0  0  0  0  0  0  0  0  0  0
    0.0253    0.3845    0.0000 C   0  0  0  0  0  0  0  0  0  0  0  0
    1.8863    0.0039    0.0000 O   0  0  0  0  0  0  0  0  0  0  0  0
   -1.5849    0.0639    0.0000 C   0  0  0  0  0  0  0  0  0  0  0  0
   -1.8863   -0.7041    0.0000 C   0  0  0  0  0  0  0  0  0  0  0  0
   -1.3719   -1.3491    0.0000 C   0  0  0  0  0  0  0  0  0  0  0  0
   -0.5561   -1.2261    0.0000 C   0  0  0  0  0  0  0  0  0  0  0  0
    0.1564   -1.1702    0.0000 H   0  0  0  0  0  0  0  0  0  0  0  0
  1  2  1  0      
  2  3  1  0      
  3  4  1  0      
  4  5  1  0      
  5  6  1  0      
  6  7  1  0      
  7  1  1  0      
  3  8  1  1      
  7  8  1  1      
  1  9  1  6      
  5 10  1  0      
 10 11  1  0      
 11 12  1  0      
 12 13  1  0      
  6 13  1  6      
  6 14  1  1      
M  END
